# Supplementary material for: Development of Blended Biopolymer-Based Photocatalytic Hydrogel Beads for Adsorption and Photodegradation of Dyes
Source: MDPI journal article supplement (doi:10.3390/gels9080630), 2023-08-05
Supplement: s1 [file s1]

*Supplementary Material*

## **Development of blended biopolymer-based photocatalytic hydrogel beads for adsorption and photodegradation of dyes**

Seung Hyeon Weon<sup>a,†</sup>, Jiwoo Han<sup>a,†</sup>, Yong-Keun Choi<sup>a,b</sup>, Saerom Park<sup>a,b,\*</sup> and Sang Hyun Lee<sup>a,\*</sup>

<sup>a</sup> Department of Biological Engineering, Konkuk University, Seoul 05029, Republic of Korea

<sup>b</sup> R&D Team, ChoiLab Inc., Seoul 01811, Republic of Korea

<sup>†</sup> These authors contributed equally to this work.

### **\*Corresponding authors:**

Saerom Park

Tel.: +82-10-4038-4656

E-mail: [angel4y@naver.com](mailto:angel4y@naver.com)

Sang Hyun Lee

Tel.: +82-2-2049-6269

E-mail: [sanghlee@konkuk.ac.kr](mailto:sanghlee@konkuk.ac.kr)

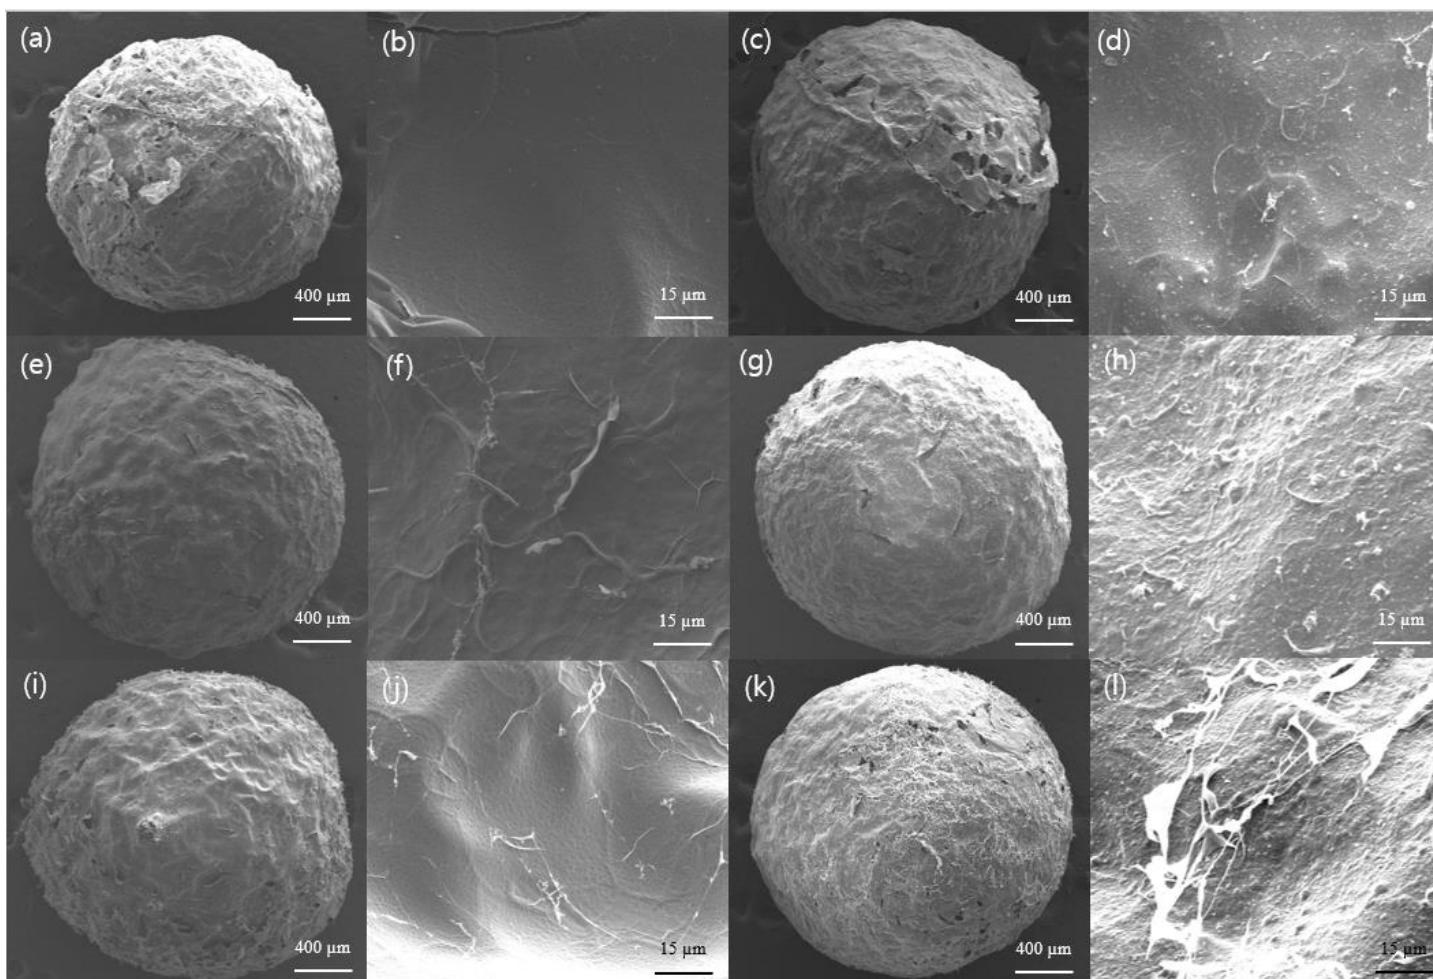

Figure S1. SEM images of freeze-dried biopolymers/TiO<sub>2</sub> beads. (a, b): cellulose; (c, d): cellulose/TiO<sub>2</sub>; (e, f): cellulose/chitosan; (g, h): cellulose/chitosan/TiO<sub>2</sub>; (i, j): cellulose/carrageenan; (k, l): cellulose/carrageenan/TiO<sub>2</sub>.

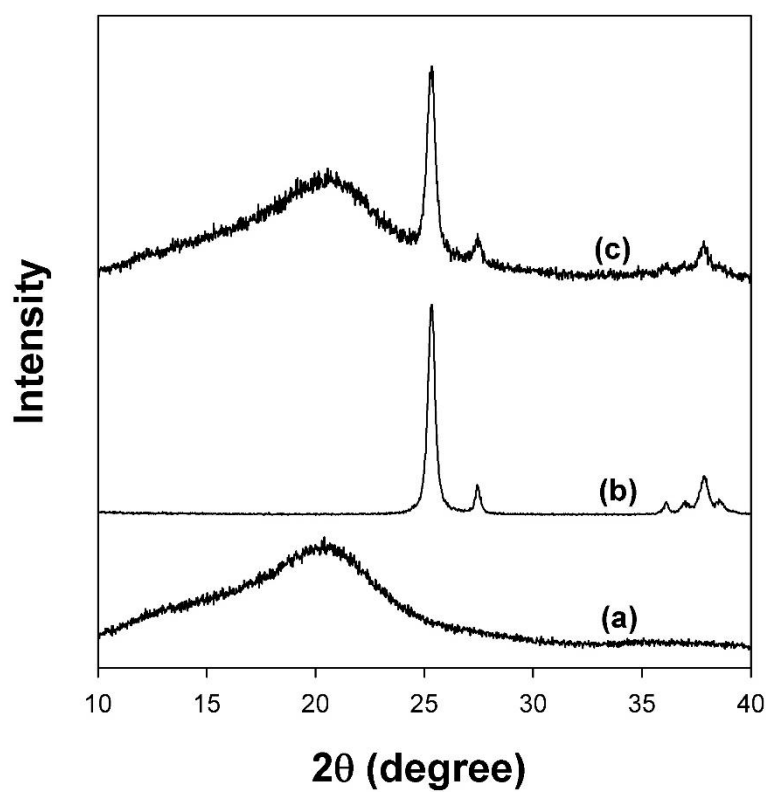

Figure S2. X-ray diffraction patterns of (a) cellulose beads, (b)  $\text{TiO}_2$ , and (c) cellulose/ $\text{TiO}_2$  beads. The contents of cellulose and  $\text{TiO}_2$  in the hydrogel beads forming solutions were 7% (w/v) and 0.5% (w/v), respectively.

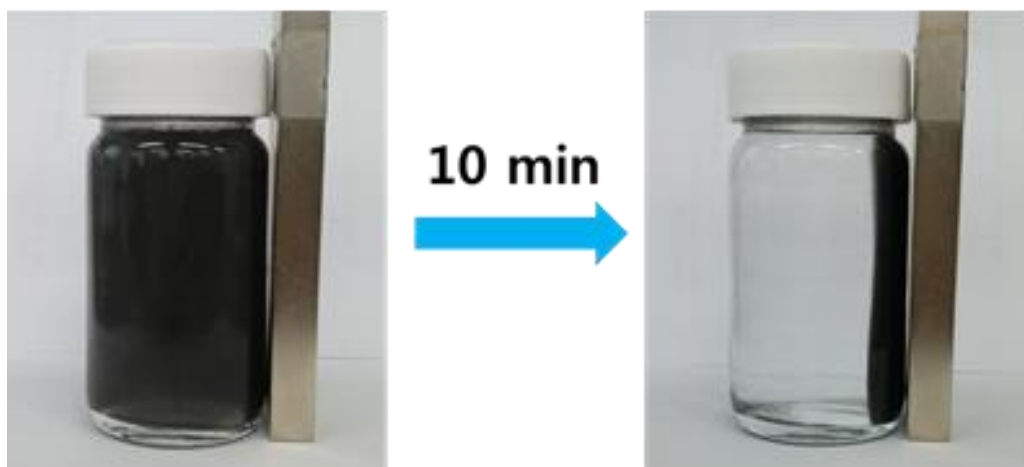

Figure S3. Recovery of cellulose/TiO<sub>2</sub>/Fe<sub>2</sub>O<sub>3</sub> hydrogel microbeads using a neodymium magnet.

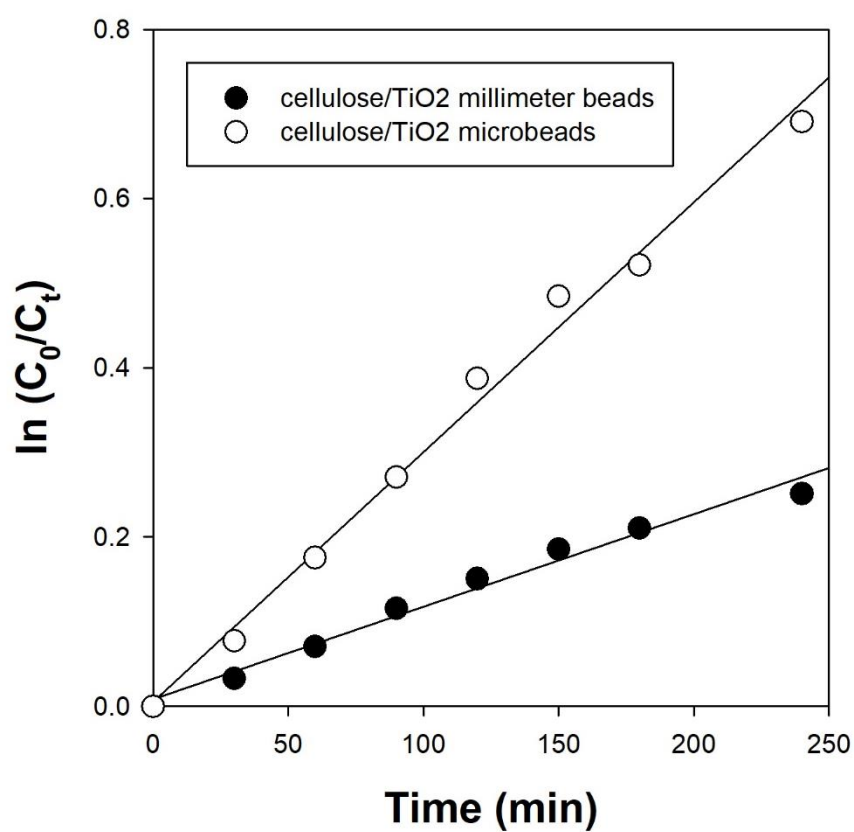

Figure S4. Plotting of “ $\ln (C_0/C_t)$  vs.  $t$ ” to determine the photodegradation activity of cellulose/TiO<sub>2</sub> millimeter-sized hydrogel beads (●) and cellulose/TiO<sub>2</sub> hydrogel microbeads (○).
